# Supplementary material for: Snail-Regulated Exosomal MicroRNA-21 Suppresses NLRP3 Inflammasome Activity to Enhance Chemoresistance
Source: Research Square preprint supplement (doi:10.21203/rs.3.rs-877605/v1), 2021-09-29
Supplement: Supplementary file 1 [file 39b2e2996360ed9f37037a66.xlsx]

## Sheet: 工作表1
Supplementary Table 5. Cell counts of different immune cells of the single cell RNA sequencing experiment
Sample name	Total cells count	B cells	CD4+ T cells	CD8+ T cells	Dendritic cells	Macrophages	Monocytes	NKT cells	Stroma cells	T-reg cells
CTRL	5320	453	1822	1898	120	397	184	126	101	219
miR-21 KO	7194	1	35	1468	898	2100	1073	837	678	104
All samples	12514	454	1857	3366	1018	2497	1257	963	779	323
