# Supplementary material for: Snail-Regulated Exosomal MicroRNA-21 Suppresses NLRP3 Inflammasome Activity to Enhance Chemoresistance
Source: Research Square preprint supplement (doi:10.21203/rs.3.rs-877605/v1), 2021-09-29
Supplement: Supplementary file 1 [file c024df55c018e0b9e6520fa7.pdf]

## Reporting Summary

Nature Portfolio wishes to improve the reproducibility of the work that we publish. This form provides structure for consistency and transparency in reporting. For further information on Nature Portfolio policies, see our [Editorial Policies](#) and the [Editorial Policy Checklist](#).

### Statistics

For all statistical analyses, confirm that the following items are present in the figure legend, table legend, main text, or Methods section.

n/a Confirmed

- The exact sample size ( $n$ ) for each experimental group/condition, given as a discrete number and unit of measurement
- A statement on whether measurements were taken from distinct samples or whether the same sample was measured repeatedly
- The statistical test(s) used AND whether they are one- or two-sided  
*Only common tests should be described solely by name; describe more complex techniques in the Methods section.*
- A description of all covariates tested
- A description of any assumptions or corrections, such as tests of normality and adjustment for multiple comparisons
- A full description of the statistical parameters including central tendency (e.g. means) or other basic estimates (e.g. regression coefficient) AND variation (e.g. standard deviation) or associated estimates of uncertainty (e.g. confidence intervals)
- For null hypothesis testing, the test statistic (e.g.  $F$ ,  $t$ ,  $r$ ) with confidence intervals, effect sizes, degrees of freedom and  $P$  value noted  
*Give  $P$  values as exact values whenever suitable.*
- For Bayesian analysis, information on the choice of priors and Markov chain Monte Carlo settings
- For hierarchical and complex designs, identification of the appropriate level for tests and full reporting of outcomes
- Estimates of effect sizes (e.g. Cohen's  $d$ , Pearson's  $r$ ), indicating how they were calculated

*Our web collection on [statistics for biologists](#) contains articles on many of the points above.*

### Software and code

Policy information about [availability of computer code](#)

#### Data collection

Gene Set Enrichment Analysis (GSEA): <https://www.gsea-msigdb.org/gsea/index.jsp>  
 Database for Annotation, Visualization and Integrated Discovery (DAVID): <https://david.ncifcrf.gov/>  
 Loupe browser 5: <https://www.10xgenomics.com/products/loupe-browser>  
 Partek Flow: <https://www.partek.com/partek-flow/>  
 CIPR: <https://aekiz.shinyapps.io/CIPR/>  
 XENA: <https://xenabrowser.net/>  
 cBioPortal: <https://www.cbioportal.org/>  
 ImageJ: <https://imagej.nih.gov/ij/>  
 Prism8: <https://www.graphpad.com/scientific-software/prism/>

#### Data analysis

Gene Set Enrichment Analysis (GSEA) was used to identify classes of genes that are over-represented in a large set of genes. Database for Annotation, Visualization and Integrated Discovery (DAVID) was used to analysis gene ontology (GO) between clusters in single cell sequencing. Loupe browser 5 was used to analysis Visium Spatial Gene Expression. Partek Flow was used to analysis single cell sequencing and output gene expression data. CIPR was used to annotate cell clusters in single cell RNA sequencing. XENA and cBioPortal were used to collect The Cancer Genome Atlas Program (TCGA) data. ImageJ software was used for quantification of multiplex immunofluorescence staining. Prism software was used for statistical analysis.

For manuscripts utilizing custom algorithms or software that are central to the research but not yet described in published literature, software must be made available to editors and reviewers. We strongly encourage code deposition in a community repository (e.g. GitHub). See the Nature Portfolio [guidelines for submitting code & software](#) for further information.

## Data

Policy information about [availability of data](#)

All manuscripts must include a [data availability statement](#). This statement should provide the following information, where applicable:

- Accession codes, unique identifiers, or web links for publicly available datasets
- A description of any restrictions on data availability
- For clinical datasets or third party data, please ensure that the statement adheres to our [policy](#)

The small RNA sequencing data were deposited in the Gene Expression Omnibus (GEO) with the accession number GSE99474.  
 The TVGH RNA sequencing data were deposited in the GEO with the accession number GSE178537 (review token: mnytwiwedxkfvf).  
 The single cell RNA sequencing data were deposited in the GEO with the accession number GSE172326 (review token: mxqtioykdbetip).  
 The Visium Spatial Gene Expression data were deposited in the GEO with the accession number GSE181300 (review token: wjuhsswmvnylxub).

## Field-specific reporting

Please select the one below that is the best fit for your research. If you are not sure, read the appropriate sections before making your selection.

Life sciences       Behavioural & social sciences       Ecological, evolutionary & environmental sciences

For a reference copy of the document with all sections, see [nature.com/documents/nr-reporting-summary-flat.pdf](https://www.nature.com/documents/nr-reporting-summary-flat.pdf)

## Life sciences study design

All studies must disclose on these points even when the disclosure is negative.

|                 |                                                                                                                                                           |
|-----------------|-----------------------------------------------------------------------------------------------------------------------------------------------------------|
| Sample size     | We performed at least three biologically independent experiments for all key data presented, and each experiments included multiple technical replicates. |
| Data exclusions | There was no exclusion from the experiments.                                                                                                              |
| Replication     | All attempts at replication were successful.                                                                                                              |
| Randomization   | Experiments were all randomized.                                                                                                                          |
| Blinding        | Analysis was performed blindly.                                                                                                                           |

## Reporting for specific materials, systems and methods

We require information from authors about some types of materials, experimental systems and methods used in many studies. Here, indicate whether each material, system or method listed is relevant to your study. If you are not sure if a list item applies to your research, read the appropriate section before selecting a response.

### Materials & experimental systems

|                                     |                                                                 |
|-------------------------------------|-----------------------------------------------------------------|
| n/a                                 | Involved in the study                                           |
| <input type="checkbox"/>            | <input checked="" type="checkbox"/> Antibodies                  |
| <input type="checkbox"/>            | <input checked="" type="checkbox"/> Eukaryotic cell lines       |
| <input checked="" type="checkbox"/> | <input type="checkbox"/> Palaeontology and archaeology          |
| <input type="checkbox"/>            | <input checked="" type="checkbox"/> Animals and other organisms |
| <input type="checkbox"/>            | <input checked="" type="checkbox"/> Human research participants |
| <input checked="" type="checkbox"/> | <input type="checkbox"/> Clinical data                          |
| <input checked="" type="checkbox"/> | <input type="checkbox"/> Dual use research of concern           |

### Methods

|                                     |                                                    |
|-------------------------------------|----------------------------------------------------|
| n/a                                 | Involved in the study                              |
| <input checked="" type="checkbox"/> | <input type="checkbox"/> ChIP-seq                  |
| <input type="checkbox"/>            | <input checked="" type="checkbox"/> Flow cytometry |
| <input checked="" type="checkbox"/> | <input type="checkbox"/> MRI-based neuroimaging    |

## Antibodies

Antibodies used

Anti-CD63 Antibody, clone RFAC4, Merck KGaA, CBL553  
 Anti-CD81 antibody, GeneTex, GTX101766  
 Alix (3A9) Mouse mAb, Cell Signaling Technology, #2171  
 Snail (L70G2) Mouse mAb, for WB, Cell Signaling Technology, #3895  
 Snail polyclonal antibody, for IHC, Abnova Corporation, PAB1924  
 Monoclonal ANTI-FLAG® M2 antibody, Merck KGaA, F1804  
 Purified anti-HA.11 Epitope Tag Antibody, BioLegend, 901502  
 Anti-Caspase-1 antibody, Abcam plc, ab17820  
 IL-1 $\beta$  Antibody (H-153), Santa Cruz Biotechnology, sc-7884

Anti-IL-6 antibody [B-E8], Abcam plc, ab11449  
 Human IL-8/CXCL8 Antibody, R&D Systems, AF-208-NA  
 Human CCL2/JE/MCP-1 Antibody, R&D Systems, AF-279-NA  
 Human CCL5/RANTES Antibody, R&D Systems, AF-278-NA  
 ASC Antibody (N-15), for WB and IP, Santa Cruz Biotechnology, sc-22514-R  
 ASC/TMS1 Antibody, for PLA, Novus Biologicals, NBP1-78977  
 anti-NLRP3/NALP3, mAb antibody (Cryo-2), Adipogen Life Sciences, AG-20B-0014  
 K63-linkage Specific Polyubiquitin (D7A11) Rabbit mAb, Cell Signaling Technology, #5621  
 CD14 MicroBeads human, Miltenyi Biotec, 130-050-201  
 IFN gamma Monoclonal Antibody (XMG1.2), Thermo Fisher Scientific Inc, 17-7311  
 CD8a Antibody, anti-mouse, PE, Miltenyi Biotec, 130-102-595  
 PE/Cyanine7 anti-mouse CD45 Antibody, BioLegend, 103114  
 APC anti-mouse F4/80 Antibody, BioLegend, 123116  
 PE/Cyanine7 Rat IgG2b, κ Isotype Ctrl Antibody, BioLegend, 400617  
 APC Rat IgG2a, κ Isotype Ctrl Antibody, BioLegend, 400511  
 CD68 Ab, Agilent Technologies, M0876  
 Goat anti-Mouse IgG, Thermo Fisher Scientific Inc, F2761  
 Anti-Actin Antibody, Thermo Fisher Scientific Inc, MAB1501  
 GAPDH (14C10) Rabbit mAb, Thermo Fisher Scientific Inc, #2118  
 normal mouse IgG, Santa Cruz Biotechnology, sc-2025  
 BRCC3 (D5E5H) Rabbit mAb, Cell Signaling Technology, #18215  
 PTEN (D4.3) XP® Rabbit mAb, Cell Signaling Technology, #9188  
 Anti-CD9 antibody, Abcam plc, ab92726  
 Anti-CD81 antibody, GeneTex, GTX101766  
 Anti-Calreticulin antibody, Abcam plc, ab39897  
 CD45 MicroBeads for mouse, Miltenyi Biotec, 130-052-301  
 PerCP anti-mouse F4/80 Antibody, BioLegend, 123126  
 CD4 for multiplex IHC, Thermo Fisher Scientific Inc, Clone: 4B12  
 CD8a, for multiplex IHC, Thermo Fisher Scientific Inc, Clone: C8/144B  
 CD163, for multiplex IHC, Thermo Fisher Scientific Inc, Clone: 10D6  
 CD68, for multiplex IHC, Abcam plc, Clone: KPI  
 CD66b, for multiplex IHC, BD, Clone: G10F5  
 PanCK, for multiplex IHC, Abcam plc, Clone: AE1/AE3+5D3

## Validation

*Describe the validation of each primary antibody for the species and application, noting any validation statements on the manufacturer's website, relevant citations, antibody profiles in online databases, or data provided in the manuscript.*

## Eukaryotic cell lines

### Policy information about [cell lines](#)

## Cell line source(s)

FaDu cells, ATCC, HTB-43  
 OECM1 cells, Dr. Kuo-Wei Chang's lab, SCC180 (Merck KGaA)  
 THP-1 cells, ATCC, TIB-202  
 HEK 293T cells, ATCC, CRL-3216  
 MTC-Q1, Dr. Kuo-Wei Chang's lab, DOI: 10.1016/j.oraloncology.2019.06.026  
 LLC1, ATCC, CRL-1642  
 4T1, ATCC, CRL-2539

## Authentication

Cells lines are authenticated at GeneLabs Life Science Corp. using short tandem repeat DNA profiling.

## Mycoplasma contamination

Mycoplasma contamination were tested by PCR, all cell lines were tasted negative.

Commonly misidentified lines  
(See [ICLAC](#) register)

N/A

## Animals and other organisms

### Policy information about [studies involving animals](#); [ARRIVE guidelines](#) recommended for reporting animal research

## Laboratory animals

6-8 weeks old wild type C57BL/6JNarl female mice and Nlrp3 Knockout C57BL/6JNarl female mice

## Wild animals

N/A

## Field-collected samples

N/A

## Ethics oversight

The animal study was approved by the Institutional Animal Care and Utilization Committee of National Yang Ming Chiao Tung University (IACUC certificate No. 1090514) and Taipei Veterans General Hospital (IACUC certificate No. 2013-169)

Note that full information on the approval of the study protocol must also be provided in the manuscript.

## Human research participants

Policy information about [studies involving human research participants](#)

|                            |                                                                                                                                                                                                                                                                                                                                                                                                                                                                                                                                                                                                                                                                                                                                                                                                                                                                                                                                                                                |
|----------------------------|--------------------------------------------------------------------------------------------------------------------------------------------------------------------------------------------------------------------------------------------------------------------------------------------------------------------------------------------------------------------------------------------------------------------------------------------------------------------------------------------------------------------------------------------------------------------------------------------------------------------------------------------------------------------------------------------------------------------------------------------------------------------------------------------------------------------------------------------------------------------------------------------------------------------------------------------------------------------------------|
| Population characteristics | Peripheral blood mononuclear cell collection from healthy donors was approved by the Institutional Review Board of both Taipei Veterans General Hospital. For HNSCC patients RNA-seq analysis, total of 44 tumor samples and 21 normal oral epithelia from 21 HNSCC patients (21 males with a mean age=58) were collected. For multiplex immunofluorescent analysis, total of 9 tumor samples from HNSCC patients include 9 males, mean age=58 were collected. For RT-qPCR analysis, total of 50 tumor samples from HNSCC patients include 45 males and 5 females, 26T=1-2 & 24T=3-4, 20N=0 & 30N=1-3, mean age=61 were collected. For serum collection and related tumor samples, total of 19 tumor samples from HNSCC patients include 17 males & 2 females, 6T=1-2 & 13T=3-4, 3N=0 & 16N=1-3, mean age=55 were collected. For immunofluorescence and PLA staining, total of 5 tumor samples from HNSCC patients include 5 males, 2T=2 & 3T=3-4, 2N<2 & 3N=2 were collected. |
| Recruitment                | The patients who received treatment at Taipei Veterans General Hospital were recruited with signed informed consents.                                                                                                                                                                                                                                                                                                                                                                                                                                                                                                                                                                                                                                                                                                                                                                                                                                                          |
| Ethics oversight           | The study was approved by the Institutional Review Board of both Taipei Veterans General Hospital with the numbers below:<br>TVGH-IRB certificate No. 2014-03-004AC<br>TVGH-IRB certificate No.2017-05-013AC<br>TVGH-IRB certificate No.2018-06-001BC                                                                                                                                                                                                                                                                                                                                                                                                                                                                                                                                                                                                                                                                                                                          |

Note that full information on the approval of the study protocol must also be provided in the manuscript.

## Flow Cytometry

### Plots

Confirm that:

- The axis labels state the marker and fluorochrome used (e.g. CD4-FITC).
- The axis scales are clearly visible. Include numbers along axes only for bottom left plot of group (a 'group' is an analysis of identical markers).
- All plots are contour plots with outliers or pseudocolor plots.
- A numerical value for number of cells or percentage (with statistics) is provided.

### Methodology

|                           |                                                                                                                                                                                                                                                                |
|---------------------------|----------------------------------------------------------------------------------------------------------------------------------------------------------------------------------------------------------------------------------------------------------------|
| Sample preparation        | Tumor tissue were digested with type IV collagenase and washed with 10% FBS contained PBS to harvest cells. then cells were stained with fluorescent conjugated antibody for 30 min, if staining with intracellular cytokine, Perm/Wash Buffer (BD) were used. |
| Instrument                | Beckman Coulter CytoFLEX were used as flow analysis, BD FACSAria was used to sort cells.                                                                                                                                                                       |
| Software                  | CytExpert (v2.3)                                                                                                                                                                                                                                               |
| Cell population abundance | Cells were counted and analysis at least 10000 cells of the main target (e.g. TAM)                                                                                                                                                                             |
| Gating strategy           | For flow analysis, gating of FSC/SSC were avoid doublets. F4/80+ FLICA+ cells were gated as Caspase1 activated macrophages. CD45+ CD8+ IFN- $\gamma$ + cells were gated as cytotoxic T cell.                                                                   |

Tick this box to confirm that a figure exemplifying the gating strategy is provided in the Supplementary Information.
