# Supplementary material for: Snail-Regulated Exosomal MicroRNA-21 Suppresses NLRP3 Inflammasome Activity to Enhance Chemoresistance
Source: Research Square preprint supplement (doi:10.21203/rs.3.rs-877605/v1), 2021-09-29
Supplement: Supplementary file 2 [file c57588e26f7ceaa1c71a611c.xlsx]

## Sheet: 工作表1
Supplementary Table 8. GO enrichment analysis of the TAMs from MTCQ1-WT- vs. MTCQ1mir21-/--formed tumors
Category	Term	Count	%	PValue	Genes	List Total	Pop Hits	Pop Total	Fold Enrichment	Bonferroni	Benjamini	FDR
GOTERM_BP_DIRECT	GO:0006955~immune response	20	9.17431	5.03109e-11	ENSMUSG00000026573, ENSMUSG00000029373, ENSMUSG00000059256, ENSMUSG00000055170, ENSMUSG00000045827, ENSMUSG00000041954, ENSMUSG00000029379, ENSMUSG00000079186, ENSMUSG00000022156, ENSMUSG00000026117, ENSMUSG00000028965, ENSMUSG00000024910, ENSMUSG00000015441, ENSMUSG00000035352, ENSMUSG00000021508, ENSMUSG00000039315, ENSMUSG00000029380, ENSMUSG00000000817, ENSMUSG00000051998, ENSMUSG00000073888	186	272	18082	7.14817	5.5191e-08	5.5191e-08	5.45873e-08
GOTERM_BP_DIRECT	GO:0006954~inflammatory response	21	9.63303	4.03758e-10	ENSMUSG00000049130, ENSMUSG00000026573, ENSMUSG00000027221, ENSMUSG00000056054, ENSMUSG00000025473, ENSMUSG00000029373, ENSMUSG00000023031, ENSMUSG00000048376, ENSMUSG00000041954, ENSMUSG00000048521, ENSMUSG00000008845, ENSMUSG00000029379, ENSMUSG00000056071, ENSMUSG00000029304, ENSMUSG00000026117, ENSMUSG00000028965, ENSMUSG00000045551, ENSMUSG00000035352, ENSMUSG00000029380, ENSMUSG00000032911,…	186	344	18082	5.93464	4.42923e-07	2.21461e-07	2.19039e-07
GOTERM_BP_DIRECT	GO:0030593~neutrophil chemotaxis	11	5.04587	1.98592e-09	ENSMUSG00000042265, ENSMUSG00000049130, ENSMUSG00000056054, ENSMUSG00000042284, ENSMUSG00000035352, ENSMUSG00000055170, ENSMUSG00000029380, ENSMUSG00000029379, ENSMUSG00000056071, ENSMUSG00000029304, ENSMUSG00000041754	186	69	18082	15.4981	2.17855e-06	7.26183e-07	7.18239e-07
GOTERM_BP_DIRECT	GO:0019835~cytolysis	8	3.66972	4.30892e-09	ENSMUSG00000015441, ENSMUSG00000059256, ENSMUSG00000023132, ENSMUSG00000015437, ENSMUSG00000037202, ENSMUSG00000069516, ENSMUSG00000079186, ENSMUSG00000022156	186	25	18082	31.1088	4.72688e-06	1.18172e-06	1.1688e-06
GOTERM_BP_DIRECT	GO:0006935~chemotaxis	11	5.04587	3.6942e-07	ENSMUSG00000049130, ENSMUSG00000026573, ENSMUSG00000045551, ENSMUSG00000056054, ENSMUSG00000029373, ENSMUSG00000035352, ENSMUSG00000048521, ENSMUSG00000073599, ENSMUSG00000055633, ENSMUSG00000029379, ENSMUSG00000056071	186	118	18082	9.06242	0.000405171	8.10507e-05	8.01641e-05
GOTERM_BP_DIRECT	GO:0090023~positive regulation of neutrophil chemotaxis	6	2.75229	8.62208e-06	ENSMUSG00000049130, ENSMUSG00000026573, ENSMUSG00000021702, ENSMUSG00000032380, ENSMUSG00000029380, ENSMUSG00000029379	186	28	18082	20.8318	0.00941387	0.0015764	0.00155916
GOTERM_BP_DIRECT	GO:0032496~response to lipopolysaccharide	11	5.04587	3.61976e-05	ENSMUSG00000049130, ENSMUSG00000056054, ENSMUSG00000018341, ENSMUSG00000029373, ENSMUSG00000049871, ENSMUSG00000048376, ENSMUSG00000041954, ENSMUSG00000029380, ENSMUSG00000000817, ENSMUSG00000029379, ENSMUSG00000028965	186	197	18082	5.42825	0.0389314	0.00506526	0.00500985
GOTERM_BP_DIRECT	GO:0007155~cell adhesion	17	7.79817	4.04162e-05	ENSMUSG00000033024, ENSMUSG00000074570, ENSMUSG00000026193, ENSMUSG00000032011, ENSMUSG00000079853, ENSMUSG00000030173, ENSMUSG00000022371, ENSMUSG00000028583, ENSMUSG00000079852, ENSMUSG00000022240, ENSMUSG00000089727, ENSMUSG00000029304, ENSMUSG00000021702, ENSMUSG00000067599, ENSMUSG00000042284, ENSMUSG00000021806, ENSMUSG00000067591	186	485	18082	3.40754	0.0433689	0.00506526	0.00500985
GOTERM_BP_DIRECT	GO:0002376~immune system process	15	6.88073	4.15563e-05	ENSMUSG00000030144, ENSMUSG00000025491, ENSMUSG00000056054, ENSMUSG00000027636, ENSMUSG00000056071, ENSMUSG00000026117, ENSMUSG00000023349, ENSMUSG00000001128, ENSMUSG00000060591, ENSMUSG00000015217, ENSMUSG00000031722, ENSMUSG00000051998, ENSMUSG00000030413, ENSMUSG00000032446, ENSMUSG00000030114	186	383	18082	3.80738	0.0445647	0.00506526	0.00500985
GOTERM_BP_DIRECT	GO:0060326~cell chemotaxis	7	3.21101	0.0001475	ENSMUSG00000026573, ENSMUSG00000045551, ENSMUSG00000042284, ENSMUSG00000021508, ENSMUSG00000035352, ENSMUSG00000029380, ENSMUSG00000073888	186	78	18082	8.72443	0.149405	0.0161807	0.0160037
GOTERM_BP_DIRECT	GO:0006915~apoptotic process	17	7.79817	0.000261065	ENSMUSG00000079056, ENSMUSG00000049130, ENSMUSG00000056054, ENSMUSG00000055170, ENSMUSG00000023132, ENSMUSG00000041954, ENSMUSG00000032380, ENSMUSG00000056071, ENSMUSG00000028965, ENSMUSG00000068220, ENSMUSG00000015437, ENSMUSG00000073599, ENSMUSG00000037202, ENSMUSG00000016758, ENSMUSG00000050953, ENSMUSG00000000817, ENSMUSG00000030413	186	570	18082	2.8994	0.249057	0.0255458	0.0252664
GOTERM_BP_DIRECT	GO:0001913~T cell mediated cytotoxicity	4	1.83486	0.000279444	ENSMUSG00000078452, ENSMUSG00000045827, ENSMUSG00000015437, ENSMUSG00000053219	186	13	18082	29.9123	0.264049	0.0255458	0.0252664
GOTERM_BP_DIRECT	GO:0048771~tissue remodeling	4	1.83486	0.000352983	ENSMUSG00000021702, ENSMUSG00000023031, ENSMUSG00000017737, ENSMUSG00000032911	186	14	18082	27.7757	0.321106	0.0297863	0.0294605
GOTERM_BP_DIRECT	GO:0051354~negative regulation of oxidoreductase activity	3	1.37615	0.000616302	ENSMUSG00000031760, ENSMUSG00000023132, ENSMUSG00000031722	186	4	18082	72.9113	0.491501	0.0482916	0.0477634
GOTERM_BP_DIRECT	GO:0009615~response to virus	6	2.75229	0.00170673	ENSMUSG00000025491, ENSMUSG00000026573, ENSMUSG00000060591, ENSMUSG00000055170, ENSMUSG00000001444, ENSMUSG00000089727	186	84	18082	6.94393	0.846473	0.124819	0.123453
GOTERM_BP_DIRECT	GO:0016485~protein processing	6	2.75229	0.00189405	ENSMUSG00000015441, ENSMUSG00000059256, ENSMUSG00000015437, ENSMUSG00000079186, ENSMUSG00000022156, ENSMUSG00000021477	186	86	18082	6.78245	0.875037	0.129861	0.12844
GOTERM_BP_DIRECT	GO:0070098~chemokine-mediated signaling pathway	5	2.29358	0.00240835	ENSMUSG00000026573, ENSMUSG00000029373, ENSMUSG00000035352, ENSMUSG00000029380, ENSMUSG00000029379	186	55	18082	8.83773	0.929005	0.155409	0.153709
GOTERM_BP_DIRECT	GO:0006508~proteolysis	15	6.88073	0.00270872	ENSMUSG00000029223, ENSMUSG00000025473, ENSMUSG00000023031, ENSMUSG00000028111, ENSMUSG00000059256, ENSMUSG00000023132, ENSMUSG00000079186, ENSMUSG00000022156, ENSMUSG00000021477, ENSMUSG00000042385, ENSMUSG00000024910, ENSMUSG00000015441, ENSMUSG00000017737, ENSMUSG00000015437, ENSMUSG00000031722	186	582	18082	2.50554	0.948978	0.160818	0.159058
GOTERM_BP_DIRECT	GO:0045087~innate immune response	12	5.50459	0.00278535	ENSMUSG00000030144, ENSMUSG00000023349, ENSMUSG00000025491, ENSMUSG00000001128, ENSMUSG00000056054, ENSMUSG00000060591, ENSMUSG00000015217, ENSMUSG00000032899, ENSMUSG00000030413, ENSMUSG00000056071, ENSMUSG00000030114, ENSMUSG00000026117	186	400	18082	2.91645	0.953103	0.160818	0.159058
GOTERM_BP_DIRECT	GO:0002250~adaptive immune response	7	3.21101	0.00309006	ENSMUSG00000030144, ENSMUSG00000023349, ENSMUSG00000055170, ENSMUSG00000051998, ENSMUSG00000027636, ENSMUSG00000032446, ENSMUSG00000026117	186	139	18082	4.89572	0.966461	0.16949	0.167636
GOTERM_BP_DIRECT	GO:0001525~angiogenesis	9	4.12844	0.00329337	ENSMUSG00000031465, ENSMUSG00000028717, ENSMUSG00000026193, ENSMUSG00000032011, ENSMUSG00000025473, ENSMUSG00000035352, ENSMUSG00000090698, ENSMUSG00000073599, ENSMUSG00000032911	186	239	18082	3.66082	0.973185	0.172039	0.170157
GOTERM_BP_DIRECT	GO:0007169~transmembrane receptor protein tyrosine kinase signaling pathway	6	2.75229	0.00365165	ENSMUSG00000031465, ENSMUSG00000066682, ENSMUSG00000039315, ENSMUSG00000032911, ENSMUSG00000032899, ENSMUSG00000026117	186	100	18082	5.8329	0.981924	0.182084	0.180093
GOTERM_BP_DIRECT	GO:0050729~positive regulation of inflammatory response	5	2.29358	0.00394846	ENSMUSG00000026573, ENSMUSG00000056054, ENSMUSG00000025473, ENSMUSG00000035352, ENSMUSG00000056071	186	63	18082	7.71548	0.986964	0.188325	0.186264
GOTERM_BP_DIRECT	GO:0030101~natural killer cell activation	3	1.37615	0.00538896	ENSMUSG00000068227, ENSMUSG00000050241, ENSMUSG00000030325	186	11	18082	26.5132	0.997335	0.246321	0.243626
GOTERM_BP_DIRECT	GO:0008285~negative regulation of cell proliferation	11	5.04587	0.0063042	ENSMUSG00000025491, ENSMUSG00000046532, ENSMUSG00000042284, ENSMUSG00000055170, ENSMUSG00000048376, ENSMUSG00000050953, ENSMUSG00000018217, ENSMUSG00000022114, ENSMUSG00000026249, ENSMUSG00000069309, ENSMUSG00000028965	186	384	18082	2.78481	0.999029	0.268023	0.265091
GOTERM_BP_DIRECT	GO:0016525~negative regulation of angiogenesis	5	2.29358	0.00635241	ENSMUSG00000031465, ENSMUSG00000021702, ENSMUSG00000029373, ENSMUSG00000073599, ENSMUSG00000000817	186	72	18082	6.75105	0.99908	0.268023	0.265091
GOTERM_BP_DIRECT	GO:0002523~leukocyte migration involved in inflammatory response	3	1.37615	0.00754053	ENSMUSG00000056054, ENSMUSG00000025473, ENSMUSG00000056071	186	13	18082	22.4342	0.999752	0.306369	0.303018
GOTERM_BP_DIRECT	GO:0042127~regulation of cell proliferation	8	3.66972	0.00895945	ENSMUSG00000028717, ENSMUSG00000029373, ENSMUSG00000023031, ENSMUSG00000041954, ENSMUSG00000032899, ENSMUSG00000029379, ENSMUSG00000022114, ENSMUSG00000028965	186	227	18082	3.42608	0.999948	0.351018	0.347179
GOTERM_BP_DIRECT	GO:0002690~positive regulation of leukocyte chemotaxis	3	1.37615	0.0100155	ENSMUSG00000026573, ENSMUSG00000029373, ENSMUSG00000055633	186	15	18082	19.443	0.999984	0.378861	0.374716
GOTERM_BP_DIRECT	GO:0014002~astrocyte development	3	1.37615	0.0127998	ENSMUSG00000031760, ENSMUSG00000056054, ENSMUSG00000056071	186	17	18082	17.1556	0.999999	0.458722	0.453704
GOTERM_BP_DIRECT	GO:0070374~positive regulation of ERK1 and ERK2 cascade	7	3.21101	0.012963	ENSMUSG00000049130, ENSMUSG00000031760, ENSMUSG00000026573, ENSMUSG00000035352, ENSMUSG00000048376, ENSMUSG00000026228, ENSMUSG00000022114	186	188	18082	3.61971	0.999999	0.458722	0.453704
GOTERM_BP_DIRECT	GO:0050830~defense response to Gram-positive bacterium	5	2.29358	0.0152908	ENSMUSG00000032530, ENSMUSG00000049130, ENSMUSG00000069300, ENSMUSG00000069516, ENSMUSG00000030413	186	93	18082	5.22662	1	0.51237	0.506765
GOTERM_BP_DIRECT	GO:0010951~negative regulation of endopeptidase activity	3	1.37615	0.0158802	ENSMUSG00000045827, ENSMUSG00000060147, ENSMUSG00000042842	186	19	18082	15.3497	1	0.51237	0.506765
GOTERM_BP_DIRECT	GO:0009607~response to biotic stimulus	3	1.37615	0.0158802	ENSMUSG00000025491, ENSMUSG00000059108, ENSMUSG00000060591	186	19	18082	15.3497	1	0.51237	0.506765
GOTERM_BP_DIRECT	GO:0045780~positive regulation of bone resorption	3	1.37615	0.0175272	ENSMUSG00000027562, ENSMUSG00000025473, ENSMUSG00000029304	186	20	18082	14.5823	1	0.524245	0.518511
GOTERM_BP_DIRECT	GO:0007204~positive regulation of cytosolic calcium ion concentration	6	2.75229	0.0181659	ENSMUSG00000049130, ENSMUSG00000045551, ENSMUSG00000048376, ENSMUSG00000029380, ENSMUSG00000050953, ENSMUSG00000029379	186	148	18082	3.94115	1	0.524245	0.518511
GOTERM_BP_DIRECT	GO:0043123~positive regulation of I-kappaB kinase/NF-kappaB signaling	6	2.75229	0.0186285	ENSMUSG00000023349, ENSMUSG00000068220, ENSMUSG00000048376, ENSMUSG00000050953, ENSMUSG00000026228, ENSMUSG00000000817	186	149	18082	3.9147	1	0.524245	0.518511
GOTERM_BP_DIRECT	GO:0050755~chemokine metabolic process	2	0.917431	0.0203582	ENSMUSG00000042265, ENSMUSG00000041754	186	2	18082	97.2151	1	0.524245	0.518511
GOTERM_BP_DIRECT	GO:0070488~neutrophil aggregation	2	0.917431	0.0203582	ENSMUSG00000056054, ENSMUSG00000056071	186	2	18082	97.2151	1	0.524245	0.518511
GOTERM_BP_DIRECT	GO:2000296~negative regulation of hydrogen peroxide catabolic process	2	0.917431	0.0203582	ENSMUSG00000031760, ENSMUSG00000031722	186	2	18082	97.2151	1	0.524245	0.518511
GOTERM_BP_DIRECT	GO:2000309~positive regulation of tumor necrosis factor (ligand) superfamily member 11 production	2	0.917431	0.0203582	ENSMUSG00000025473, ENSMUSG00000055170	186	2	18082	97.2151	1	0.524245	0.518511
GOTERM_BP_DIRECT	GO:0002302~CD8-positive, alpha-beta T cell differentiation involved in immune response	2	0.917431	0.0203582	ENSMUSG00000055170, ENSMUSG00000032446	186	2	18082	97.2151	1	0.524245	0.518511
GOTERM_BP_DIRECT	GO:0051603~proteolysis involved in cellular protein catabolic process	4	1.83486	0.0205863	ENSMUSG00000024910, ENSMUSG00000028111, ENSMUSG00000023132, ENSMUSG00000021477	186	57	18082	6.82211	1	0.524245	0.518511
GOTERM_BP_DIRECT	GO:0002687~positive regulation of leukocyte migration	3	1.37615	0.0210272	ENSMUSG00000035352, ENSMUSG00000041954, ENSMUSG00000017737	186	22	18082	13.2566	1	0.524245	0.518511
GOTERM_BP_DIRECT	GO:0006334~nucleosome assembly	5	2.29358	0.0221012	ENSMUSG00000049539, ENSMUSG00000075031, ENSMUSG00000058773, ENSMUSG00000069310, ENSMUSG00000069300	186	104	18082	4.6738	1	0.538779	0.532885
GOTERM_BP_DIRECT	GO:0007200~phospholipase C-activating G-protein coupled receptor signaling pathway	4	1.83486	0.0235492	ENSMUSG00000049130, ENSMUSG00000045551, ENSMUSG00000048376, ENSMUSG00000063234	186	60	18082	6.481	1	0.561597	0.555453
GOTERM_BP_DIRECT	GO:0016337~single organismal cell-cell adhesion	5	2.29358	0.02497	ENSMUSG00000032011, ENSMUSG00000025473, ENSMUSG00000028583, ENSMUSG00000022240, ENSMUSG00000026009	186	108	18082	4.5007	1	0.582811	0.576435
GOTERM_BP_DIRECT	GO:0045672~positive regulation of osteoclast differentiation	3	1.37615	0.0267683	ENSMUSG00000027562, ENSMUSG00000027670, ENSMUSG00000055170	186	25	18082	11.6658	1	0.611768	0.605076
GOTERM_BP_DIRECT	GO:0072672~neutrophil extravasation	2	0.917431	0.0303822	ENSMUSG00000042265, ENSMUSG00000041754	186	3	18082	64.81	1	0.636109	0.62915
GOTERM_BP_DIRECT	GO:0070945~neutrophil mediated killing of gram-negative bacterium	2	0.917431	0.0303822	ENSMUSG00000042265, ENSMUSG00000041754	186	3	18082	64.81	1	0.636109	0.62915
GOTERM_BP_DIRECT	GO:0006925~inflammatory cell apoptotic process	2	0.917431	0.0303822	ENSMUSG00000055170, ENSMUSG00000000817	186	3	18082	64.81	1	0.636109	0.62915
GOTERM_BP_DIRECT	GO:0010643~cell communication by chemical coupling	2	0.917431	0.0303822	ENSMUSG00000050953, ENSMUSG00000034675	186	3	18082	64.81	1	0.636109	0.62915
GOTERM_BP_DIRECT	GO:0001938~positive regulation of endothelial cell proliferation	4	1.83486	0.0313126	ENSMUSG00000021702, ENSMUSG00000078202, ENSMUSG00000055633, ENSMUSG00000026228	186	67	18082	5.80388	1	0.636109	0.62915
GOTERM_BP_DIRECT	GO:0006919~activation of cysteine-type endopeptidase activity involved in apoptotic process	4	1.83486	0.0313126	ENSMUSG00000056054, ENSMUSG00000048376, ENSMUSG00000000817, ENSMUSG00000056071	186	67	18082	5.80388	1	0.636109	0.62915
GOTERM_BP_DIRECT	GO:0007275~multicellular organism development	18	8.25688	0.0350784	ENSMUSG00000031465, ENSMUSG00000036617, ENSMUSG00000027200, ENSMUSG00000028583, ENSMUSG00000078202, ENSMUSG00000041954, ENSMUSG00000022240, ENSMUSG00000022114, ENSMUSG00000026249, ENSMUSG00000028965, ENSMUSG00000028717, ENSMUSG00000063275, ENSMUSG00000015468, ENSMUSG00000073599, ENSMUSG00000032911, ENSMUSG00000034675, ENSMUSG00000059824, ENSMUSG00000032446	186	1029	18082	1.70055	1	0.699656	0.692002
GOTERM_BP_DIRECT	GO:0045766~positive regulation of angiogenesis	5	2.29358	0.0357891	ENSMUSG00000031465, ENSMUSG00000049130, ENSMUSG00000023031, ENSMUSG00000015468, ENSMUSG00000017737	186	121	18082	4.01715	1	0.701084	0.693415
GOTERM_BP_DIRECT	GO:0045746~negative regulation of Notch signaling pathway	3	1.37615	0.0398733	ENSMUSG00000028073, ENSMUSG00000078202, ENSMUSG00000015468	186	31	18082	9.40791	1	0.724815	0.716886
GOTERM_BP_DIRECT	GO:0002374~cytokine secretion involved in immune response	2	0.917431	0.0403042	ENSMUSG00000042265, ENSMUSG00000041754	186	4	18082	48.6075	1	0.724815	0.716886
GOTERM_BP_DIRECT	GO:0042107~cytokine metabolic process	2	0.917431	0.0403042	ENSMUSG00000042265, ENSMUSG00000041754	186	4	18082	48.6075	1	0.724815	0.716886
GOTERM_BP_DIRECT	GO:0010644~cell communication by electrical coupling	2	0.917431	0.0403042	ENSMUSG00000050953, ENSMUSG00000034675	186	4	18082	48.6075	1	0.724815	0.716886
GOTERM_BP_DIRECT	GO:0002793~positive regulation of peptide secretion	2	0.917431	0.0403042	ENSMUSG00000056054, ENSMUSG00000056071	186	4	18082	48.6075	1	0.724815	0.716886
GOTERM_BP_DIRECT	GO:0050776~regulation of immune response	3	1.37615	0.0422514	ENSMUSG00000055170, ENSMUSG00000001444, ENSMUSG00000030114	186	32	18082	9.11391	1	0.747577	0.739399
GOTERM_BP_DIRECT	GO:0051281~positive regulation of release of sequestered calcium ion into cytosol	3	1.37615	0.0446813	ENSMUSG00000026573, ENSMUSG00000032011, ENSMUSG00000048376	186	33	18082	8.83773	1	0.774313	0.765842
GOTERM_BP_DIRECT	GO:0007160~cell-matrix adhesion	4	1.83486	0.04588	ENSMUSG00000026193, ENSMUSG00000025473, ENSMUSG00000042284, ENSMUSG00000021806	186	78	18082	4.98539	1	0.774313	0.765842
GOTERM_BP_DIRECT	GO:0009749~response to glucose	4	1.83486	0.04588	ENSMUSG00000031465, ENSMUSG00000005373, ENSMUSG00000050953, ENSMUSG00000021477	186	78	18082	4.98539	1	0.774313	0.765842
GOTERM_BP_DIRECT	GO:0042742~defense response to bacterium	6	2.75229	0.0467755	ENSMUSG00000030144, ENSMUSG00000045827, ENSMUSG00000055170, ENSMUSG00000069516, ENSMUSG00000030413, ENSMUSG00000031722	186	191	18082	3.05388	1	0.777465	0.768961
GOTERM_BP_DIRECT	GO:0008625~extrinsic apoptotic signaling pathway via death domain receptors	3	1.37615	0.0496914	ENSMUSG00000041954, ENSMUSG00000000817, ENSMUSG00000028965	186	35	18082	8.33272	1	0.796917	0.7882
GOTERM_BP_DIRECT	GO:0006953~acute-phase response	3	1.37615	0.0496914	ENSMUSG00000026193, ENSMUSG00000008845, ENSMUSG00000031722	186	35	18082	8.33272	1	0.796917	0.7882
GOTERM_BP_DIRECT	GO:0018119~peptidyl-cysteine S-nitrosylation	2	0.917431	0.0501252	ENSMUSG00000056054, ENSMUSG00000056071	186	5	18082	38.886	1	0.796917	0.7882
GOTERM_BP_DIRECT	GO:0002931~response to ischemia	3	1.37615	0.0522691	ENSMUSG00000029223, ENSMUSG00000022951, ENSMUSG00000055866	186	36	18082	8.10125	1	0.810217	0.801354
GOTERM_BP_DIRECT	GO:0035556~intracellular signal transduction	9	4.12844	0.0530782	ENSMUSG00000005373, ENSMUSG00000041992, ENSMUSG00000022490, ENSMUSG00000053310, ENSMUSG00000032380, ENSMUSG00000039315, ENSMUSG00000032911, ENSMUSG00000051998, ENSMUSG00000026117	186	400	18082	2.18734	1	0.810217	0.801354
GOTERM_BP_DIRECT	GO:0010628~positive regulation of gene expression	9	4.12844	0.0531774	ENSMUSG00000031760, ENSMUSG00000046532, ENSMUSG00000026193, ENSMUSG00000029373, ENSMUSG00000045827, ENSMUSG00000055170, ENSMUSG00000050953, ENSMUSG00000055633, ENSMUSG00000022114	186	399	18082	2.19282	1	0.810217	0.801354
GOTERM_BP_DIRECT	GO:0051209~release of sequestered calcium ion into cytosol	3	1.37615	0.0548936	ENSMUSG00000026573, ENSMUSG00000048376, ENSMUSG00000026228	186	37	18082	7.8823	1	0.824908	0.815884
GOTERM_BP_DIRECT	GO:0048873~homeostasis of number of cells within a tissue	3	1.37615	0.0575636	ENSMUSG00000018012, ENSMUSG00000022371, ENSMUSG00000048376	186	38	18082	7.67487	1	0.853342	0.844007
GOTERM_BP_DIRECT	GO:0015884~folic acid transport	2	0.917431	0.0598462	ENSMUSG00000028583, ENSMUSG00000032725	186	6	18082	32.405	1	0.863832	0.854383
GOTERM_BP_DIRECT	GO:2000503~positive regulation of natural killer cell chemotaxis	2	0.917431	0.0598462	ENSMUSG00000026573, ENSMUSG00000021508	186	6	18082	32.405	1	0.863832	0.854383
GOTERM_BP_DIRECT	GO:0061458~reproductive system development	2	0.917431	0.0694682	ENSMUSG00000046532, ENSMUSG00000030231	186	7	18082	27.7757	1	0.977009	0.966321
GOTERM_BP_DIRECT	GO:0002544~chronic inflammatory response	2	0.917431	0.0694682	ENSMUSG00000056054, ENSMUSG00000050953	186	7	18082	27.7757	1	0.977009	0.966321
GOTERM_BP_DIRECT	GO:0000122~negative regulation of transcription from RNA polymerase II promoter	13	5.9633	0.0716378	ENSMUSG00000005373, ENSMUSG00000079056, ENSMUSG00000023031, ENSMUSG00000078202, ENSMUSG00000055170, ENSMUSG00000064215, ENSMUSG00000062310, ENSMUSG00000027636, ENSMUSG00000028717, ENSMUSG00000069310, ENSMUSG00000000817, ENSMUSG00000055866, ENSMUSG00000032446	186	729	18082	1.7336	1	0.994767	0.983886
GOTERM_BP_DIRECT	GO:0051781~positive regulation of cell division	3	1.37615	0.077431	ENSMUSG00000028717, ENSMUSG00000021702, ENSMUSG00000026228	186	45	18082	6.481	1	1	0.989964
GOTERM_BP_DIRECT	GO:0032609~interferon-gamma production	2	0.917431	0.0789924	ENSMUSG00000018341, ENSMUSG00000032446	186	8	18082	24.3038	1	1	0.989964
GOTERM_BP_DIRECT	GO:0002223~stimulatory C-type lectin receptor signaling pathway	2	0.917431	0.0789924	ENSMUSG00000023349, ENSMUSG00000050241	186	8	18082	24.3038	1	1	0.989964
GOTERM_BP_DIRECT	GO:0043524~negative regulation of neuron apoptotic process	5	2.29358	0.0821652	ENSMUSG00000049130, ENSMUSG00000031760, ENSMUSG00000025473, ENSMUSG00000035352, ENSMUSG00000048376	186	160	18082	3.03797	1	1	0.989964
GOTERM_BP_DIRECT	GO:0035456~response to interferon-beta	2	0.917431	0.0884195	ENSMUSG00000025491, ENSMUSG00000060591	186	9	18082	21.6033	1	1	0.989964
GOTERM_BP_DIRECT	GO:0051607~defense response to virus	5	2.29358	0.0919565	ENSMUSG00000025491, ENSMUSG00000060591, ENSMUSG00000055170, ENSMUSG00000037202, ENSMUSG00000062524	186	167	18082	2.91063	1	1	0.989964
GOTERM_BP_DIRECT	GO:0050852~T cell receptor signaling pathway	3	1.37615	0.0959004	ENSMUSG00000032011, ENSMUSG00000055170, ENSMUSG00000026117	186	51	18082	5.71853	1	1	0.989964
GOTERM_BP_DIRECT	GO:0048304~positive regulation of isotype switching to IgG isotypes	2	0.917431	0.0977507	ENSMUSG00000055170, ENSMUSG00000001444	186	10	18082	19.443	1	1	0.989964
